# Supplementary material
Source: publisher figshare collection journal article supplement (https://sage.figshare.com/ndownloader/files/14549468)
Supplement: Supplementary file 1 [file 14549468]

## Appendix 1. Options of support by a structured PPC approach

| Prenatal                                                                                                                                                          | Perinatal                                                                                                                                             | Postnatal                                                                                                    |
|-------------------------------------------------------------------------------------------------------------------------------------------------------------------|-------------------------------------------------------------------------------------------------------------------------------------------------------|--------------------------------------------------------------------------------------------------------------|
| Counseling about options of Palliative Care                                                                                                                       |                                                                                                                                                       |                                                                                                              |
| Support during pregnancy (psychological, social and spiritual aspects)                                                                                            | Support for the realization of individual wishes <ul style="list-style-type: none"> <li>- for instance, baptism</li> <li>- farewell ritual</li> </ul> | Support for the realization of wishes <ul style="list-style-type: none"> <li>- hospital discharge</li> </ul> |
| Anticipatory care planning – Birth plan<br><br>(induction of labor, caesarean section...) and<br><br>Care plan for the newborn (possible trajectory, symptoms...) | Support of the child during delivery including symptom control in the delivery room                                                                   | Symptom control after birth (pain, respiratory distress, neurological symptoms...)                           |
| Preparation of farewell, grief counseling for the family including siblings                                                                                       | Support of the whole family including siblings                                                                                                        | Support during the grieving process<br><br>(access and support psychological, social, spiritual needs)       |
| Coordination of care, care planning and communication with all involved teams, specialists, and the patient and family                                            |                                                                                                                                                       |                                                                                                              |
